# Supplementary material
Source: Research Square preprint supplement (doi:10.21203/rs.3.rs-9598396/v1)
Supplement: Supplementary file 1 [file 02e56741b02054db56625770.xlsx]

## Sheet: Table S1
Table S1. Accession id and origin of faba bean germplasm used in this study.
Accession name	NGB number	Source	Origin	Note
Aurora/2	13121	NordGen	Sweden	A relatively tall genotype with high productivity
Mélodie/2	-	INRAE	France	High efficient use of water
ILB 938/2	-	ICARDA	Colombia \ Ecuador	High water use efficiency
Birgit	-	NPZ	Germany	Improved variety
Tiffany	-	NPZ	Germany	Improved variety
Taifun	-	NPZ	Germany	Improved variety
Hedin\2	-	GAUG	Germany	Improved variety
Fuego	-	NPZ	Germany	Improved variety
Fanfare	-	NPZ	Germany	Improved variety
Kontu	-	Boreal	Finland	An old cultivar from Finland
Brottby	17820	NordGen	Sweden	Landrace from area with common spring drought, synonymous with Gerd (NGB 11731)
Solberga	13473	NordGen	Sweden	Landrace from area with high precipitation, low-statured
Kärra	17897	NordGen	Sweden	Landrace from area with high precipitation, tall-statured
Odenslund	24900	NordGen	Sweden	Landrace from area with common spring drought, tall-statured
Lövånger	14150	NordGen	Sweden	Landrace from Northern Sweden, low-statured
Dalaböna	17885	NordGen	Sweden	Landrace from central Sweden, very early
Ekholmen	17892	NordGen	Sweden	Landrace, garden type, very large seeded
Bohus delikatess	13781	NordGen	Sweden	Landrace, very late maturity, short stem, rounded leaf type.Other name: Bohusläns delikatess
Primus	4019	NordGen	Sweden	Old Swedish cultivar
Romfartuna	17889	NordGen	Sweden	Landrace, early maturity
Tyrjä me0202	1549	NordGen	Finland	Landrace
Rantala me1001	1547	NordGen	Finland	Landrace
Suontakainen me0302	1539	NordGen	Finland	Landrace
Korkeamäki	13877	NordGen	Finland	Landrace
Sairala me0503	1542	NordGen	Finland	Landrace
Horshult	17886	NordGen	Sweden	Landrace, low-statured, late maturity
Saari	1550	NordGen	Finland	Landrace
Gubbestad	11722	NordGen	Sweden	Landrace
Göteryd	13664	NordGen	Sweden	Landrace, low-statured
Imatra me0101	1551	NordGen	Finland	Landrace
Lemi me0702	1544	NordGen	Finland	Landrace
Kokkosenkylä	11518	NordGen	Finland	Landrace
AP8308100101	8644	NordGen	Finland	Landrace
Seikanlampi	8643	NordGen	Finland	Landrace
Sairala me0401 sep B	1541	NordGen	Finland	Landrace
Aunuksen kanta	20019	NordGen	Finland	Landrace
Bondböna från Kurt Jönsson	9961	NordGen	Sweden	Landrace, tall-statured. Other name: Kurt Jönsson
Laitiala AP0101	4404	NordGen	Finland	Landrace
Södergården	20196	NordGen	Sweden	Landrace
Pirhonen	13876	NordGen	Finland	Landrace
Åsbro	17888	NordGen	Sweden	Landrace
Havo ME0801	1545	NordGen	Finland	Landrace
Sigvard	17903	NordGen	Sweden	Landrace, tall-statured
Ösel	21937	NordGen	Estonia	Low, early maturity
INRAE, Institut National de la Récherche Agronomique; NPZ, Norddeutsche Pflanzenzucht; GAUG, Georg‐August‐University, Göttingen. ICARDA, International Center for Agricultural Research in the Dry Areas.
